# Supplementary material for: Transcriptome in paraffin samples for the diagnosis and prognosis of adrenocortical carcinoma
Source: PubMed Central journal article supplement (PMC9066577; doi:10.1530/eje-21-1228), 2022-03-10

## Supplementary Data

### **Supplementary Table S1. Individual patient clinical data.**

See Excel File SupplTableS1.xlsx

### **Supplementary Table S2. Individual transcriptome data.**

Raw read counts are provided for all detectable transcripts.

See csv File SupplTableS2.csv

**Supplementary Table S3. Gene signatures for calculating adrenal differentiation score, proliferation score and immune score.**

| <b>Adrenal differentiation score</b> | <b>Proliferative score</b> |          |        | <b>Immune score</b> |          |         |        |
|--------------------------------------|----------------------------|----------|--------|---------------------|----------|---------|--------|
| ABCB1                                | ASPM                       | ECT2     | NUF2   | ADAP1               | EPOR     | JAK1    | PRKCE  |
| AOX1                                 | AURKA                      | EZH2     | OIP5   | AKAP1               | ETS1     | JAK3    | PTPN11 |
| ATP4A                                | AURKB                      | FAM54A   | PIF1   | ANGPT1              | FASLG    | KDR     | PTPN6  |
| CYP11A1                              | BIRC5                      | FEN1     | PLK1   | ARAP3               | FCER1A   | KITLG   | PTPRC  |
| CYP11B1                              | BLM                        | GMPS     | PPIL5  | ARRB2               | FCER1G   | LAT2    | PTPRJ  |
| CYP11B2                              | BUB1                       | GPSM2    | PRC1   | B2M                 | FCGR2B   | LCK     | PTPRO  |
| CYP17A1                              | BUB1B                      | GTPBP4   | PSMD14 | BMX                 | FGR      | LCP2    | PXN    |
| CYP21A2                              | BYSL                       | GTSE1    | PSMD2  | BTK                 | FOXO3    | LYN     | RAB7A  |
| DLK1                                 | C13orf34                   | H2AFX    | RAD51  | CCND3               | GAB1     | MAP2K4  | RASA1  |
| FDX1                                 | C15orf23                   | HDGF     | RECQL4 | CCR5                | GNG2     | MAPK3   | RICTOR |
| FDXR                                 | C15orf42                   | HMGA1    | RRM2   | CD247               | GRAP2    | MITF    | SDCBP  |
| HOXA5                                | C1orf112                   | HN1      | SAC3D1 | CD28                | GRB10    | MLST8   | SGK1   |
| HSD3B2                               | CCNB2                      | IQGAP3   | SNRPA1 | CD3D                | GRB14    | MS4A2   | SH2B3  |
| INHA                                 | CDC20                      | KIAA0101 | SNRPD1 | CD3E                | GRB7     | MYOF    | SH3BP2 |
| MC2R                                 | CDC25A                     | KIF11    | SNRPG  | CD3G                | GZMA     | NOS2    | SLA2   |
| MGARP                                | CDC7                       | KIF14    | SPAG5  | CD4                 | HCK      | NOS3    | SMPD1  |
| NOV                                  | CDCA3                      | KIF15    | STRA13 | CD86                | HCLS1    | PAG1    | STAP1  |
| NR5A1                                | CDCA5                      | KIF23    | TACC3  | CD8A                | HLA-A    | PIK3C2B | STAT3  |
| SCARB1                               | CDT1                       | KIF2C    | THOC4  | CD8B                | HLA-DRA  | PIK3CB  | STAT4  |
| SLC16A9                              | CENPA                      | KIFC1    | TMEM97 | CDH5                | HLA-DRB1 | PIK3CD  | STAT5A |
| SOAT1                                | CENPF                      | KPNA2    | TPX2   | CDKN1A              | HSP90AB1 | PIK3CG  | STAT5B |
| STAR                                 | CENPM                      | LMNB1    | TRIP13 | CISH                | IKBKB    | PIK3R1  | STAT6  |
| SULT2A1                              | CEP55                      | LMNB2    | TROAP  | CSF2RB              | IL12RB1  | PIK3R5  | SYK    |
| TBX3                                 | CHEK1                      | MCM10    | TYMS   | CTNNA1              | IL18RAP  | PLCB2   | TBX21  |
| TM7SF2                               | CKS1B                      | MCM6     | UBE2C  | CXCL12              | IL2RA    | PLCB3   | TEK    |
|                                      | CNIH4                      | MKI67    | UBE2S  | DAPP1               | IL2RB    | PRF1    | TNF    |
|                                      | DBF4                       | MYBL2    | UBE2T  | DOK1                | IL2RG    | PRKAA1  | VAV1   |
|                                      | DDX39                      | NCAPH    | UBE2V2 | DOK2                | ITGA3    | PRKAA2  | VPS4A  |
|                                      | DNAJC9                     | NEK2     | UCK2   | DUSP1               | ITGA4    | PRKCA   | WAS    |
|                                      | DONSON                     | NOL11    | ZWINT  | ELF2                | ITGA5    | PRKCB   | ZAP70  |
|                                      | DTYMK                      |          |        | EOMES               | ITK      |         |        |

**Supplementary Table S4. Differentially expressed genes between transcriptome groups.**

See csv File SupplTableS4.csv

**Supplementary Table S5. Gene set enrichment analyses between transcriptome groups using HALLMARK annotations.**

See Excel File SupplTableS5.xlsx

**Supplementary Table S6. Differentially expressed genes between oncocytic and classic ACT.**

See Excel File SupplTableS6.xlsx

**Supplementary Table S7. Association between molecular class and clinical variables in ACC patients.**

|                                  | <b>C1A</b> | <b>C1B</b> | <b>p-value</b> |
|----------------------------------|------------|------------|----------------|
| <b>Age (y)</b>                   | 48 (20-80) | 48 (24-81) | 0.47           |
| <b>Sex</b>                       |            |            | 1              |
| Female                           | 43 (80%)   | 24 (63%)   |                |
| Male                             | 11 (20%)   | 14 (37%)   |                |
| <b>Cortisol secretion</b>        |            |            | 0.001          |
| No                               | 12 (27%)   | 23 (64%)   |                |
| Yes                              | 33 (73%)   | 13 (36%)   |                |
| <b>ENSAT stage</b>               |            |            | 0.07           |
| I-II                             | 29 (54%)   | 29 (76%)   |                |
| III                              | 15 (28%)   | 7 (18%)    |                |
| IV                               | 10 (19%)   | 2 (5%)     |                |
| <b>Ki-67 proliferation index</b> |            |            | $<10^{-7}$     |
| < 10%                            | 9 (18%)    | 22 (63%)   |                |
| 10-19 %                          | 7 (14%)    | 10 (29%)   |                |
| ≥ 20%                            | 34 (68%)   | 3 (9%)     |                |
| <b>Resection status</b>          |            |            | 0.0002         |
| R0                               | 36 (67%)   | 37 (97%)   |                |
| R1-R2-RX                         | 18 (33%)   | 1 (3%)     |                |

**Supplementary Figure S1. Survival according to FFPE transcriptome classification in the training cohort**

A. Disease-free survival according to the predicted transcriptome class in stage I-III ACC patients

B. Overall survival according to the predicted transcriptome class in stage I-IV ACC patients

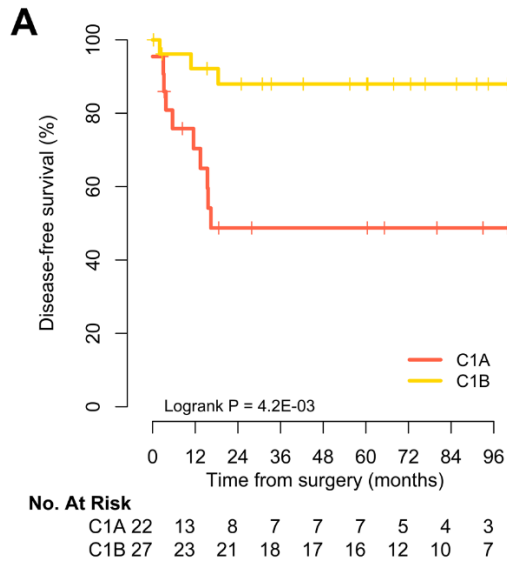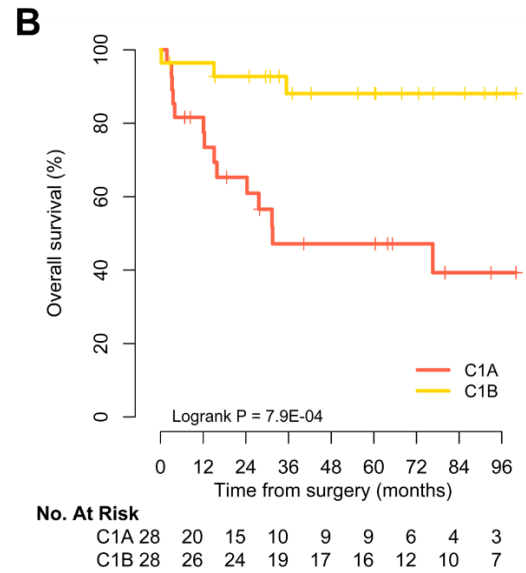

Supplement: supplementary_material.pdf [file supplementary_material.pdf]
